# Supplementary material for: Cold adaptation regulated by cryptic prophage excision in Shewanella oneidensis
Source: PubMed Central journal article supplement (PMC5148205; doi:10.1038/ismej.2016.85), 2016-08-02
Supplement: ismej201685x1.pdf [file ismej201685x1.pdf]

## SUPPLEMENTARY FILE

### Cold Adaptation Regulated by Cryptic Prophage Excision in *Shewanella oneidensis*

Zhenshun Zeng<sup>1</sup>, Xiaoxiao Liu<sup>1</sup>, Jianyun Yao<sup>1,2</sup>, Yunxue Guo<sup>1</sup>, Baiyuan Li<sup>1,2</sup>, Yangmei Li<sup>1,2</sup>,  
Nianzhi Jiao<sup>3,4</sup>, Xiaoxue Wang<sup>1\*</sup>

<sup>1</sup>Key Laboratory of Tropical Marine Bio-resources and Ecology, Guangdong Key Laboratory of Marine Material Medica, RNAM Center for Marine Microbiology, South China Sea Institute of Oceanology, Chinese Academy of Sciences, Guangzhou 510301, PR China

<sup>2</sup>University of Chinese Academy of Sciences, Beijing 100049, China

<sup>3</sup>State Key Laboratory of Marine Environmental Sciences, <sup>4</sup>Institute of Marine Microbes and Ecospheres, Xiamen University, China Xiamen University, China

\*To whom correspondence should be addressed. E-mail: xxwang@scsio.ac.cn

**Running head:** Prophage excises at low temperature

**Table S1.** List of 30 CP4So genes and the neighboring gene *ssrA* (the last row) in *S. oneidensis*.

| Gene        | Start   | Stop    | Direction | Length(nt) | Gene function                                       |
|-------------|---------|---------|-----------|------------|-----------------------------------------------------|
| SO_1440     | 1502474 | 1503232 | P         | 759        | Bifunctional toxin-antitoxin system HepN family     |
| SO_1441     | 1503494 | 1504570 | P         | 1077       | Putative cytoplasmic protein                        |
| <i>alpA</i> | 1504689 | 1504901 | P         | 213        | Phage lytic protein AlpA, SO_4821                   |
| SO_1442     | 1504940 | 1506409 | P         | 1470       | Hypothetical protein                                |
| SO_1443     | 1506725 | 1507402 | P         | 678        | unknown function DUF3296 YagK                       |
| SO_1444     | 1507549 | 1507842 | N         | 294        | Toxin module of RelE/StbE family                    |
| SO_1445     | 1507805 | 1508113 | N         | 309        | Antitoxin module of toxin-antitoxin                 |
| SO_1447     | 1508400 | 1509122 | N         | 723        | Retinol acyltransferase domain protein              |
| SO_1448     | 1509202 | 1509768 | N         | 567        | phage integrase family                              |
| SO_1450     | 1509877 | 1510284 | N         | 408        | Protein of unknown function DUF7287                 |
| SO_1451     | 1510471 | 1510884 | N         | 414        | Protein of unknown function DUF2787                 |
| SO_1453     | 1511070 | 1511444 | N         | 375        | Antitoxin of the YpjF-YfjZ toxin-antitoxin          |
| SO_1454     | 1511587 | 1511949 | N         | 363        | Hypothetical protein                                |
| SO_1455     | 1511900 | 1512463 | N         | 474        | DNA repair protein, RadC family                     |
| SO_1456     | 1512539 | 1513495 | N         | 957        | ISSod11 transposase TnpA_ISSod11                    |
| SO_1457     | 1514245 | 1516299 | P         | 2055       | Type II restriction-modification system, M subunit  |
| SO_1458     | 1516296 | 1517591 | P         | 1296       | B-loop ATPase superfamily protein                   |
| SO_1459     | 1517594 | 1518256 | P         | 663        | Concanavalin A-like lectin/glucanase domain protein |
| SO_1460     | 1518253 | 1519662 | P         | 1410       | Type I restriction-modification system, S subunit   |
| SO_1461     | 1519672 | 1523802 | P         | 4131       | Serine/threonine protein kinase                     |
| SO_1462     | 1523799 | 1525445 | P         | 1647       | Type I restriction-modification system locus        |
| SO_1463     | 1525442 | 1532103 | P         | 6662       | Unknown                                             |
| SO_1464     | 1530017 | 1531176 | P         | 1160       | ISSod1 transposase TnpA_ISSod1                      |
| SO_1467     | 1532409 | 1533017 | P         | 609        | Unknown                                             |
| SO_1468     | 1533026 | 1534087 | P         | 1062       | ADP-ribose binding domain-containing protein        |
| SO_1469     | 1534142 | 1534396 | N         | 255        | Transcriptional regulator Cro/CI family             |
| SO_4773     | 1534619 | 1534951 | P         | 333        | Predicted membrane protein                          |
| SO_4774     | 1534987 | 1535256 | N         | 270        | Unknown                                             |
| SO_1470     | 1535896 | 1536510 | P         | 615        | Hypothetical protein                                |
| <i>intA</i> | 1536629 | 1537876 | N         | 1248       | P4-like prophage integrase IntA , SO_1471           |
| SO_m003     | 1538145 | 1538499 | N         | 355        | Transfer-messenger RNA, tmRNA                       |

**Table S2.** Statistical analysis of the whole-genome deep-sequencing results includes the average insertion length of library, total reads, Q20% and the average coverage with the reference genome.

| Samples | Insert Size | Read Length | Raw Data (Mb) | Raw Reads Number | Q20 (%) | Average coverage | Clean Data (Mb) | Clean Reads Number |
|---------|-------------|-------------|---------------|------------------|---------|------------------|-----------------|--------------------|
| 4 °C    | 300         | 151         | 5751.7        | 19045375*2       | 95.7    | 1157x            | 5472.8          | 18245631*2         |
| 30 °C   | 300         | 151         | 2105.8        | 6972888*2        | 95.3    | 423x             | 1990.8          | 6632972*2          |

**Table S3.** The alignment of the whole-genome deep-sequencing data was shown using the genome of *S. oneidensis* MR-1 (5 Mb, <http://www.ncbi.nlm.nih.gov/genome/?term=MR-1>) as reference.

| Samples | PCR-dup Rate | Mapped Data (Mb) | Mapped Reads Number | Mapped Reads % | Average Bases (bp) | Coverage | Average Depth |
|---------|--------------|------------------|---------------------|----------------|--------------------|----------|---------------|
| 4 °C    | 4.3%         | 5196.3           | 35410497            | 95.01          | 4969808            | 100%     | 1045.6        |
| 30 °C   | 5.3%         | 1928.4           | 13179571            | 96.92          | 4969805            | 100%     | 388.0         |

**Table S4.** Nucleotide sequences of the primers or primer pairs used in this study. f indicates forward primer and r indicates reverse primer. Expected size of PCR products in the wild-types or in the mutants are also shown, respectively.

| <b>Primer /Purpose</b>                     | <b>Primer Sequence (listed 5' to 3')</b> | <b>Expected Size (bp)</b> |
|--------------------------------------------|------------------------------------------|---------------------------|
| <b>PCR for screening CP4-57So excision</b> |                                          |                           |
| SmpB-f                                     | CCTTTATGCATGGCTGTACC                     |                           |
| SO_1439-r                                  | CCTTATCCTTGTCATCGGGT                     | 985( $\Delta$ CP4So)      |
| SO_1444-f                                  | GCCCCACAAATAGTCTTCACTGC                  |                           |
| SO_1444-r                                  | CCATATCCGGCTTCTTTTTGGTG                  | 293                       |
| IntA-f                                     | CGGGATCCATGGCAAGACTTACTAAGCCG            |                           |
| IntA-r                                     | CCCAAGCTTTTATTGAGCTACAAGCCTTA            | 1265                      |
| SmpB-r                                     | AACCCGTAGCGTAAAGATAACC                   | 362                       |
| Circle-f                                   | AACCATACAGCCACAAGACCG                    |                           |
| Circle-r                                   | GCCAATAACAACACCTTAGCACC                  | 830 (CP4So circle)        |
| <b>qPCR</b>                                |                                          |                           |
| CP4So-f                                    | AGCGCCTTGGATGTAGGTTTT                    | 193                       |
| CP4So-r                                    | TCGCTTGGGAATACCATTTTGAA                  |                           |
| LambdaSo-f                                 | ACTTTTGCATCGGCTTCGAT                     | 200                       |
| LambdaSo-r                                 | AGGCGGTATTTTCGGGTTTG                     |                           |
| MuSo1-f                                    | TCGCAAGGCAATTACGTGAA                     | 220                       |
| MuSo1-r                                    | AATTCTGTGACCATCGCCATTA                   |                           |
| MuSo2-f                                    | TGTAAACGGGATCGAAGTGTTG                   | 210                       |
| MuSo2-r                                    | TGGCAAGTGGGTAAGCGAAT                     |                           |
| gyrB_f                                     | CGGATGCTTTACCACCCAAT                     | 200                       |
| gyrB_r                                     | TGCGTGTCGATACCGTGTTT                     |                           |
| <b>qRT-PCR</b>                             |                                          |                           |
| alpA                                       | CACAACCTCTCACAAGCAATTCCA                 | 188                       |
|                                            | GCAGCCACTGTTGACTTCTT                     |                           |
| intA                                       | GCAGGGCTTTGATCCTGATG                     | 178                       |
|                                            | TCTGGCATTATGCGCAAGAC                     |                           |
| hns                                        | TGGAAGCAGAAGAGCTGCAA                     | 175                       |

|         |                                                                      |     |
|---------|----------------------------------------------------------------------|-----|
| rrsE    | TCGCCGTCAACTTCAATTTG<br>TTCGCGTTGCATCGAATTAA<br>CCTGGTAGTCCACGCCGTAA | 189 |
| SO_3012 | CGCCAGCTCAACTTGCAAA<br>CGTTCTCGTAAATCCACGCTTA                        | 150 |

**Construction of in-frame deletion mutants**

|          |                                                         |
|----------|---------------------------------------------------------|
| ssrA-5-O | GGGGACAAGTTTGTACAAAAAAGCAGGCTCTTGGCACTCTCAATCTAAGGAAACA |
| ssrA-5-I | GGTCCGGGTTCGCTATCTATCAAGAAAGTTGATTGTAACCCGTAGCG         |
| ssrA-3-O | GGGACCACTTTGTACAAGAAAGCTGGGTAAATACCTGATAGGGGATTGGCA     |
| ssrA-3-I | ATAGATAGCGAACCCGGACCAATGATAGAACGAAGACGTCCTAG            |
| alpA-5-O | GGGGACAAGTTTGTACAAAAAAGCAGGCTTGTAGAGTATCTTAGGTTAAGCAACG |
| alpA-5-I | GGTCCGGGTTCGCTATCTATAATCGTCCTCAGAGTTGTGAATAAAC          |
| alpA-3-O | GGGACCACTTTGTACAAGAAAGCTGGGTGTTAAATTTCTCAATCGCCTTCTT    |
| alpA-3-I | ATAGATAGCGAACCCGGACCTGCTGATCTTAAAAAGTCACTAAC            |
| intA-5-O | GGGGACAAGTTTGTACAAAAAAGCAGGCTACCCATGTGGTCTGCGATCCTATA   |
| intA-5-I | GGTCCGGGTTCGCTATCTATAACAACACCTTAGCACCAATATTT            |
| intA-3-O | GGGACCACTTTGTACAAGAAAGCTGGGTAGGGGGGTACATCAGGTTTCAGTG    |
| intA-3-I | ATAGATAGCGAACCCGGACCCGAGAAATGATGACCTGGTGGAGT            |
| hns-5-O  | GGGGACAAGTTTGTACAAAAAAGCAGGCTGCTTTTACCCTGACCTTCAC       |
| hns-5-I  | GGACAATCCGCTGTTTTTCGCTATTTTCGTCCCACTCTAT                |
| hns-3-O  | GGGACCACTTTGTACAAGAAAGCTGGGTCATAATCGGTAAAGGGATCG        |
| hns-3-I  | CGAAAACAGGCGGATTGTCTCCAGAACTGTGTTGGTAACA                |

**Confirmation of mutants by PCR followed by DNA sequencing**

|        |                        |
|--------|------------------------|
| ssrA-f | CGACAAGCGTGAAGATACCA   |
| ssrA-r | GCCATAACAACACCTTAGCACC |
| hns-f  | TAGGGTTTCCTTCCTACA     |
| hns-r  | TGTTGTTTATCAGCATTT     |
| alpA-f | CTGACATTCCCGAAACAAG    |
| alpA-r | ATACATTAAGTCCCTG       |
| intA-f | GCCTTGGATGTAGGTTTTC    |
| intA-r | GTGTCAGGTTTCATTGTCGT   |

**Constrction of expression vectors**

|                                   |                                                            |      |
|-----------------------------------|------------------------------------------------------------|------|
| alpA-F                            | GGAATTCATGAACACAACCTCTCACAAGC                              | 229  |
| alpA-R                            | CCCAAGCTTTTCAGCAAAATCTTCTACCTT                             |      |
| intA-F                            | CGGGATCCATGGCAAGACTTACTAAGCCG                              | 1265 |
| intA-R                            | CCCAAGCTTTTTATTGAGCTACAAGCCTTA                             |      |
| ssrA-F                            | GGAATTCGGGGGCGATTCTGGATTGACA                               | 371  |
| ssrA-R                            | CCCAAGCTTTGGTGGAGGCGGCGGGACTTGA                            |      |
| ssrA-delU-R                       | CCCAAGCTTTGGTGGGGCGGCGGGACTTGAAC                           | 370  |
| pET28b-hns-F                      | CTAGCCATGGGCATGAGCGAATTTTTAGAAATATTAACCTCACGG              | 439  |
| pET28b-hns-R                      | TAAGAATGCGGCCGCTTAGTGGTGGTGGTGGTGGTGGATTAAGAAATCATCCATAGAA |      |
| <b>Amplify fragments for EMSA</b> |                                                            |      |
| alpA promoter-f                   | GATTTTCTAGTGACAGAAGGTTTTAGCG                               | 237  |
| alpA promoter-r                   | GTGAGAGTTGTGTTTCATAATCGTCCTC                               |      |
| SO_3012 promoter-f                | TAGCGATGAAATGGCTTTTTGGG                                    | 172  |
| SO_3012 promoter-r                | CTGCTGCACCACTTTACCCTGC                                     |      |

---

**Fig. S1 Confirmation of CP4So excision by PCR. (a) Schematic of the CP4So excision induced by temperature downshift.** Site-specific recombination occurs through the cross-over between *attL* and *attR* sites to generate the  $\Delta$ CP4So strain and phage-like circle CP4So<sup>circle</sup> (which is lost subsequently). Location of primer pairs SmpB-f/SO\_1439-r, and circle-f/circle-r are also shown. **(b) Deletion of CP4So was confirmed by PCR.** Lanes 1, 3, 5 and 7 used DNAs from the wild-type strain, and lanes 2, 4, 6 and 8 used DNAs from the  $\Delta$ CP4So strain. Primer pair SmpB-f/SO\_1439-r was used to amplify a 985 bp fragment only when the whole CP4So was removed (marked with an arrow). Primer pairs (SO\_1444-f/-r and IntA-f/-r) were used to detect the presence of CP4So-specific genes (PCR products are 293 bp and 1265 bp in the wild-type strain, respectively). As control, primer pair SmpB-f/-r was used to amplify a 362 bp fragment in *smpB* gene outside CP4So. **(c) Circularized CP4So prophage was confirmed by PCR.** Lanes 1 and 2 used DNAs from the wild-type cells induced by AlpA and non-induced AlpA, respectively. Primer pair Circle-f/-r was used to amplify an 830 bp fragment only when the excised CP4So was circularized (marked with an arrow).

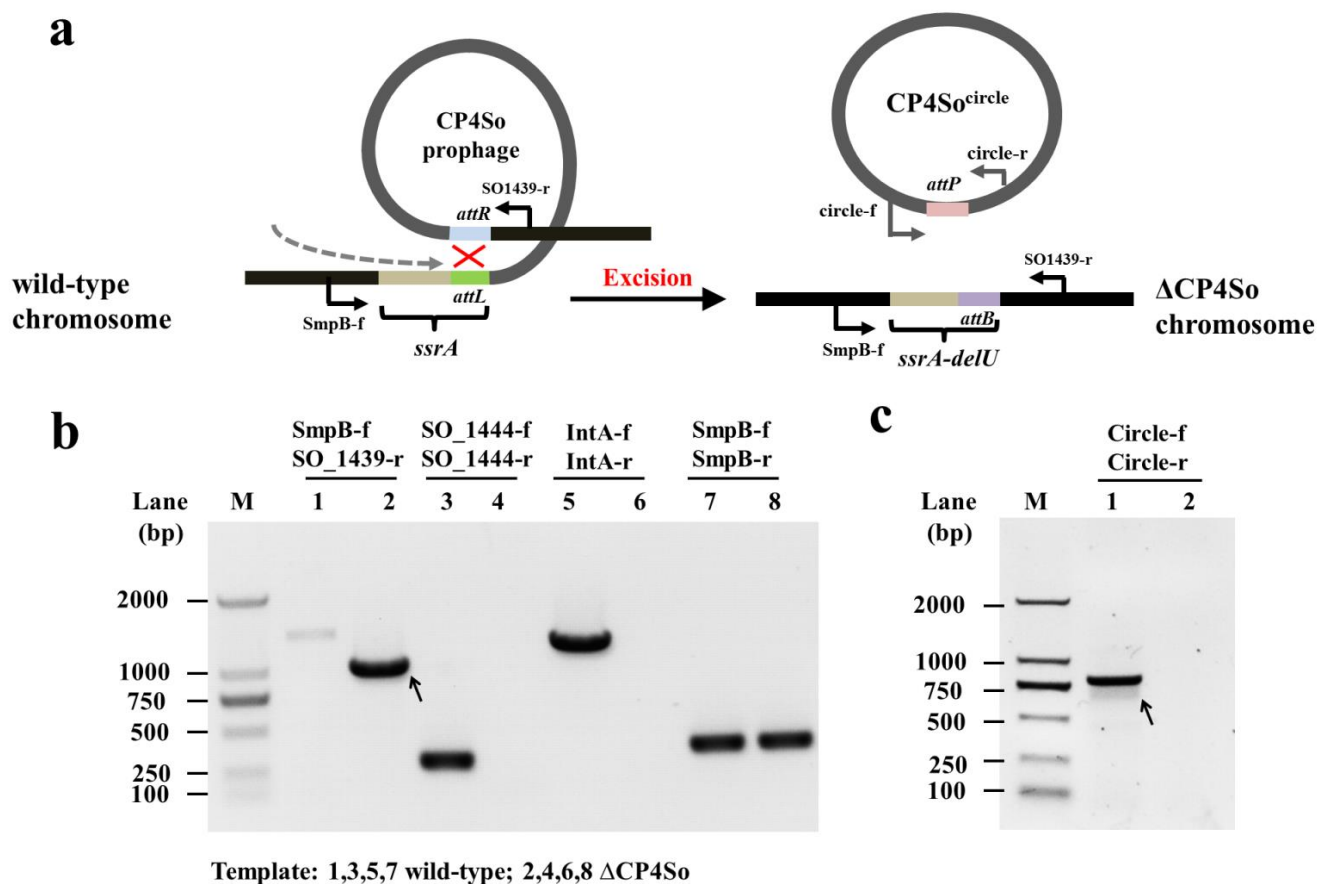

**Fig. S2 Excision rates of CP4So when exposed to low temperatures.** Excision rates of CP4So in *S. oneidensis* at different time points after exposed to the cold temperatures from exponentially growing cells at 30 °C of OD 600 nm of around 1.0. Data are from three independent experiments and one standard deviation is shown.

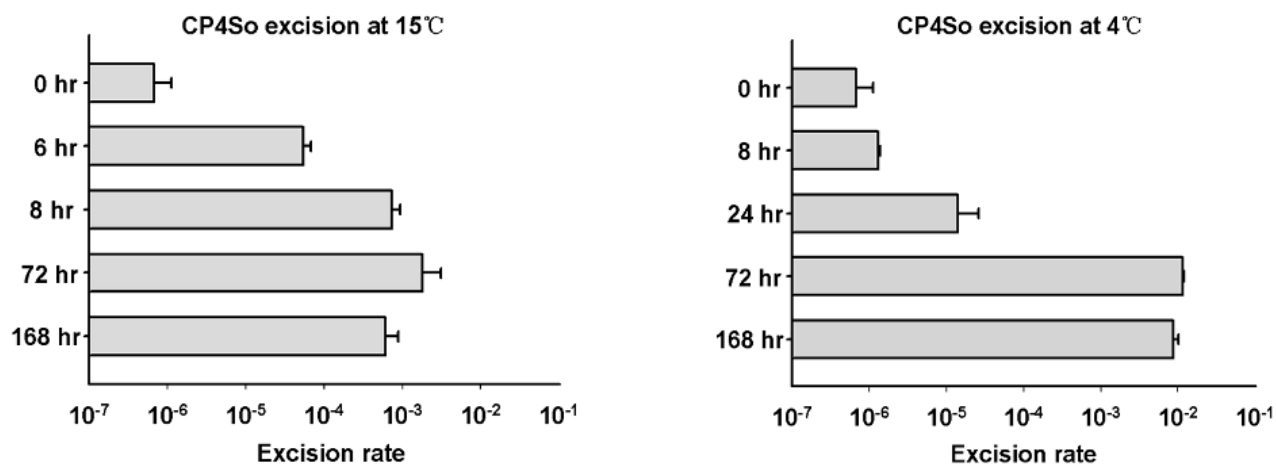

**Fig. S3 Excision rates of CP4So and LambdaSo in *S. oneidensis* upon initiation of the SOS response.** The excision rate of was measured upon initiation of the SOS response with the addition of 10 µg/mL mitomycin C (MMC). Data are from three independent experiments and one standard deviation is shown.

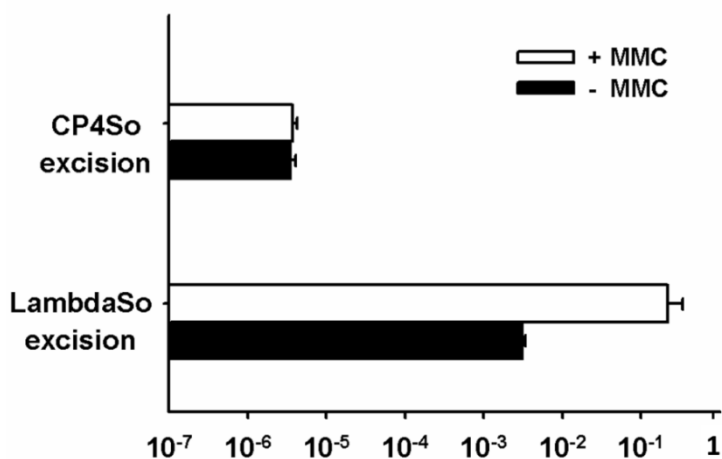



**Fig. S4 SsrA does not seem to function at cold temperatures.** Survival of cells when exposed to sublethal concentrations of gentamicin (1  $\mu\text{g}/\text{mL}$ ) for the wild-type,  $\Delta\text{ssrA}$  and  $\Delta\text{CP4So}$  strains at different temperatures. Data are from three independent cultures and only representative images are shown here.

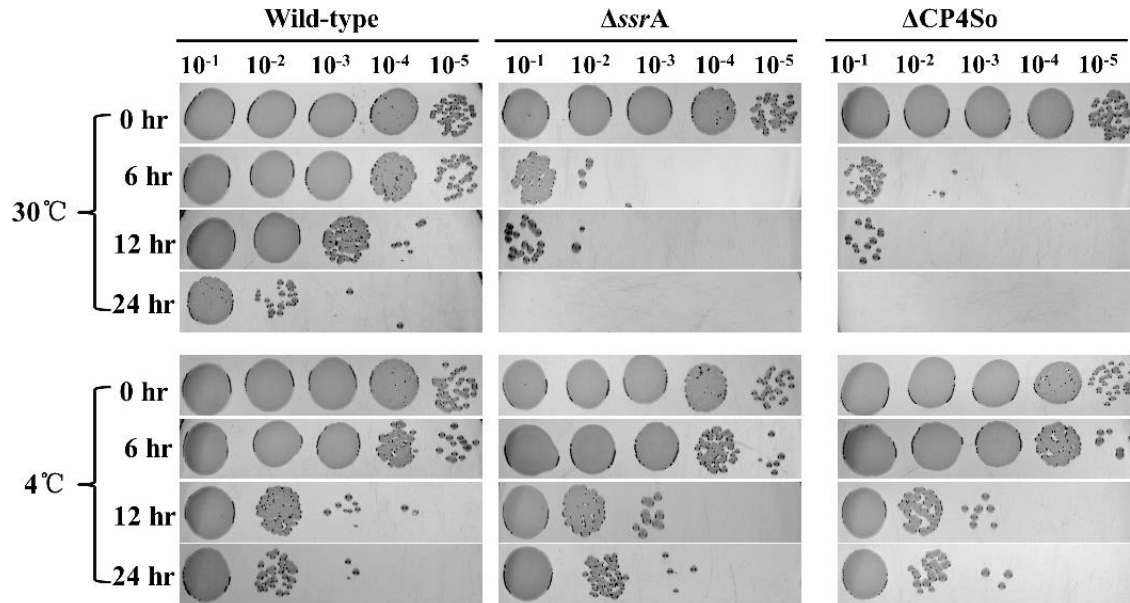

**Fig. S5 Excision of CP4So enhances survival at cold temperatures. (a)** Viability of the wild-type,  $\Delta ssrA$  and  $\Delta CP4So$  cells cultured at 4 °C for 14 days was detected by LIVE/DEAD staining method. **(b)** Viability of the wild-type,  $\Delta ssrA$  and  $\Delta CP4So$  strains was measured by a turbidity at 600 nm after transferring the cells grown at 4 °C to 30 °C with fresh LB medium. Data are from three independent cultures. One standard deviation is shown in **b**, and representative images were shown in **a**.

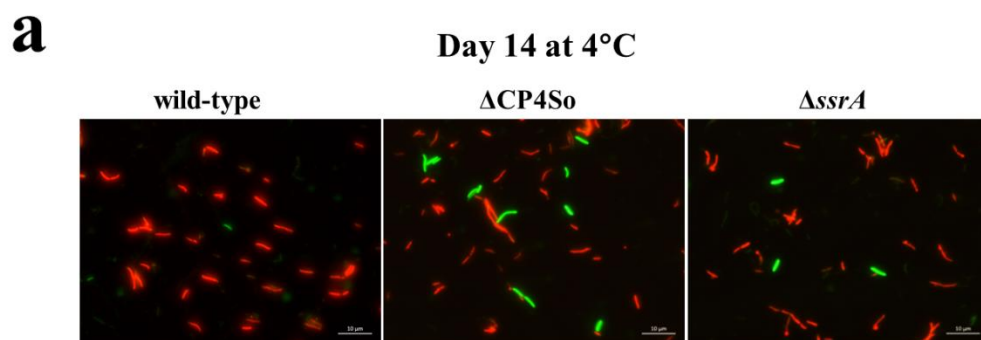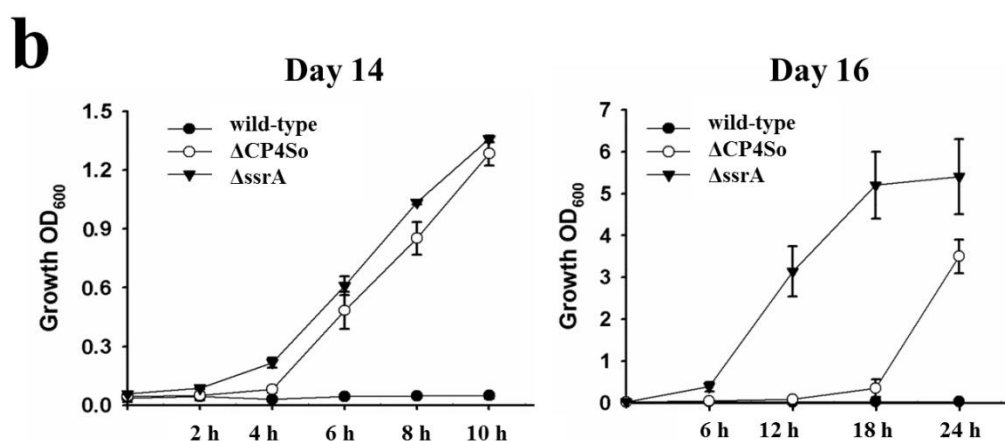

**Fig. S6 Comparison of amino acid sequence of the putative excisionase AlpA in the prophage CP4So of *S. oneidensis* MR-1 and prophage CP4-57 of *E. coli* K-12 BW25113.**

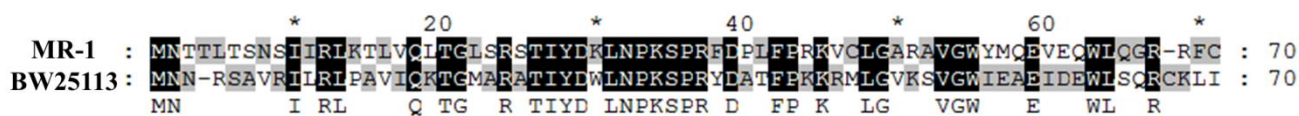

**Fig. S7 Promoter sequences and the open reading frame sequences of *alpA* gene (a) and *SO\_3012* gene (b).** (a) Primer pair AlpA-promoter-f/r used to amplify the fragments containing promoter of *alpA* was underlined and highlighted with blue. The two putative H-NS binding sites (GATAATG) were labeled with yellow. (b) Primer pair SO\_3012 promoter-f/r used to amplify the fragments containing promoter of *SO\_3012* was underlined and highlighted with blue. The numbers denote the nucleotide positions from the translation start site. The start and stop codon of each gene were labeled in green and red, respectively.

**a**

```

300 TTCCATACTTAACTTACTGCCTTGAACGTTTTTGGGATGATCAGGAAAAATTTGATAAAAATATAA
      alpA-promoter-f                               putative H-NS binding site
-234 CATCTAAAATAAAAGATTTTCTAGTGACAGAAGGTTTTAGCGTTGATAATGCCAAATATGCTGAAT
      putative H-NS binding site
-168 TATTTTTGAGACCGAGTAAATTTCTTAGGGGACCAAAAAACGCATATAATACAATGGATAATGCA
-102 ATTTAGGTGAGCAAAGGGGACCCTTTTTACCCCGTTTTATTCATGCTTCATAACCATCTAATCTCAG
      -30      -20      -10      -1      alpA-promoter-r
-36 GGTTGTAGACGTTTATTCACAACCTCTGAGGACGATATGAAACACAACCTCTCACAAGCAATTCATT
      ATTAGACTGAAGACCTTGGTTCAGCTTACAGGGCTTTCGCGTTCAACTATCTACGATAAACTCAAT
      CCCAAATCCCCCAGGTTTGATCCACTTTTTCCGCGAAAAGTTTGTCTTGGCGCTCGTGCCGTAGGC
      TGGTACATGCAAGAAGTCGAACAGTGGCTGCAAGGTAGAAGATTTTGCATGATCTTAAAAAGTCACT
  
```

**b**

```

-310 TCCATCCTAAGCCAGCGACCTAAATACGATTTATCGACCATTCAAGGCCGTGAAAAAGCTGTGATT
-244 GAAAGACTTAAAATACAAGGGTTGGTAAGTAATAAGGCAGGTGCATCATGAACACGTTTTTTCATCT
      SO_3012 promoter-f
-178 GTCTTTTTCTGCTTCCGCTAATTTGGATTTTATTCACATGGATTGGCAAAAAAATAGCGATGAAAT
-112 GGCTTTTTGGGTGGCGGTTTATCGTGATTAACGCAGAAGGTGAAGCGTGGTACATCGATGTTAAAC
      -40      -30      -20      -10      -1
-46 CTGATGCCAAAGTAAAACCTGTTGGTAAAAATAAGGACGGTGCATAATGTTTTCAGCAAGAAATAGA
      SO_3012 promoter-r
      AGCTATGCAGGGTAAAGTGGTGCAGCAGTTTTTCTCGCCAGCTCAACTTGCAAAGCGTTGGGGAT
      TGGCACAACAAAGCTATACCAACTGTTTAAAGTTGGAAGACTTCCCAAAGCCAACAACTAACCCACA
      CTTTAAAAACAAGTACAACCTTCAAGAAGTTAAAGCGTGGATTTACGAGAACGAACAATGAGGCCG
  
```

**Fig. S8 EMSA of H-NS and the promoter of excisionase gene *alpA*.** The affinity of H-NS binding to the promoter of *alpA* is comparable at different temperatures.

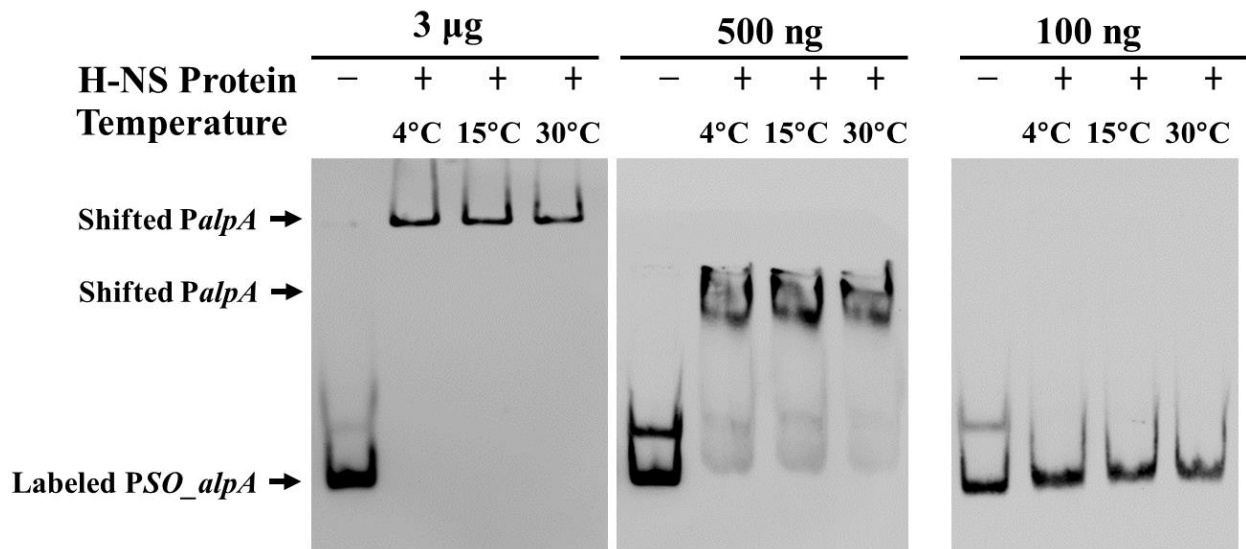

**Fig. S9 Mobile elements inserted in the tmRNA gene in different *Shewanella* strains.**

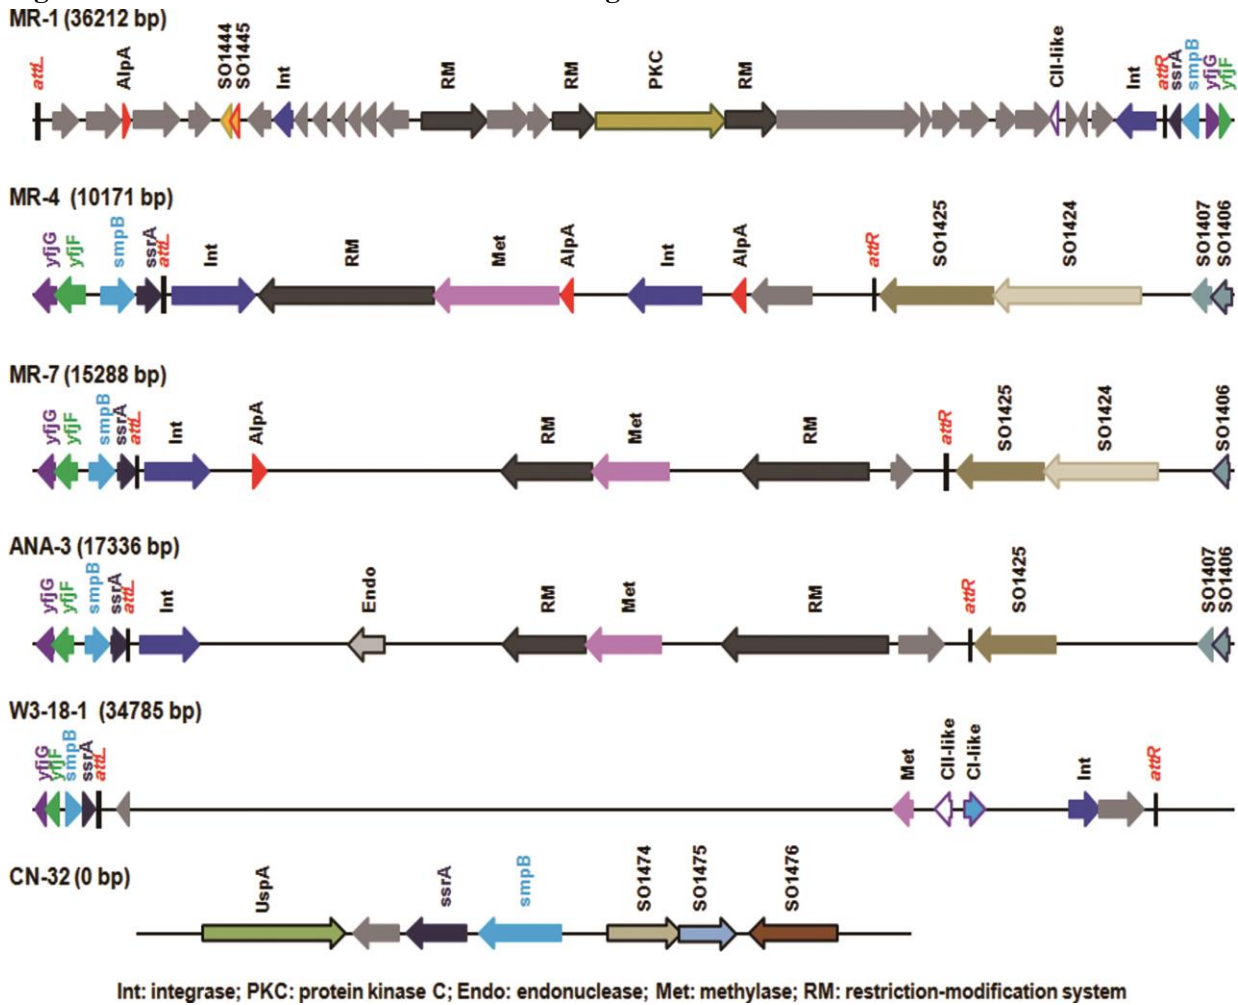

**Fig. S10 Standard curve for calibration of primer pair (CP4So-f and CP4So-r) used for measuring excision rate of CP4So in *S. oneidensis* via qPCR.** Mixed population of wild-type and  $\Delta$ CP4 DNAs were used as template to generate a standard curve. Data are from two independent cultures.

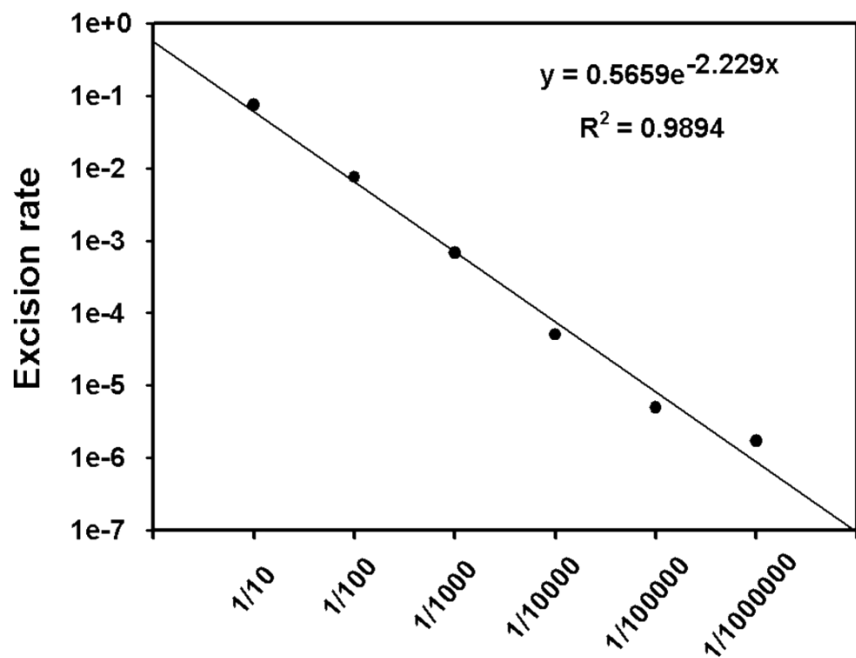

**Proportion between CP4So cells with wild-type cells**
